# Supplementary material
Source: PubMed Central journal article supplement (PMC5413413)

# Supplementary Figure 1

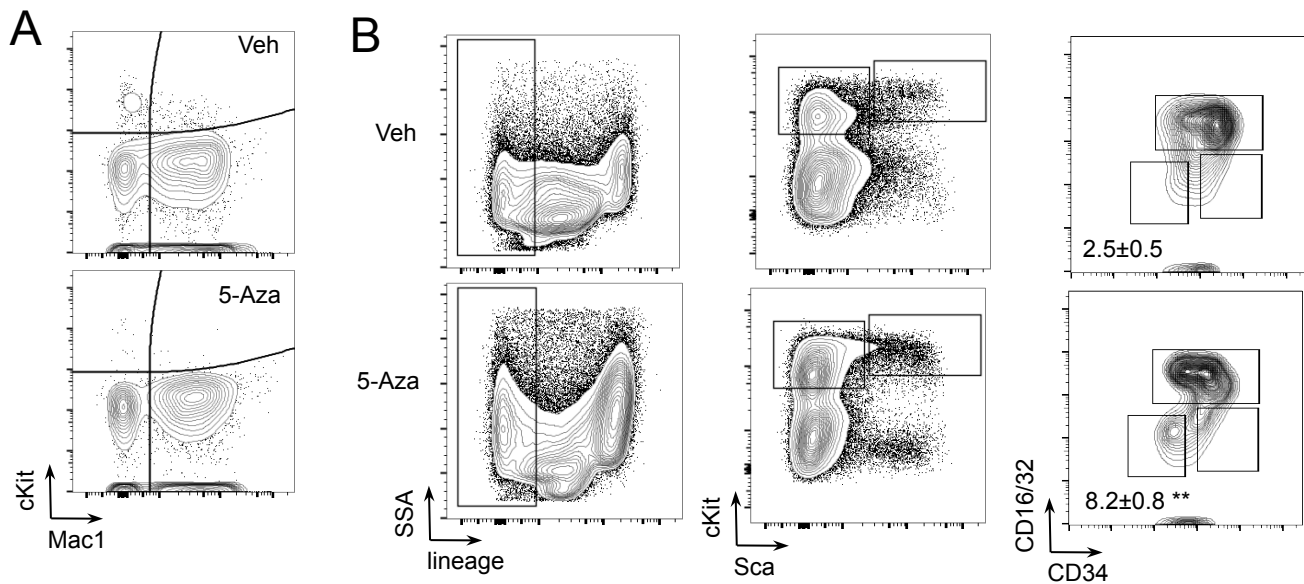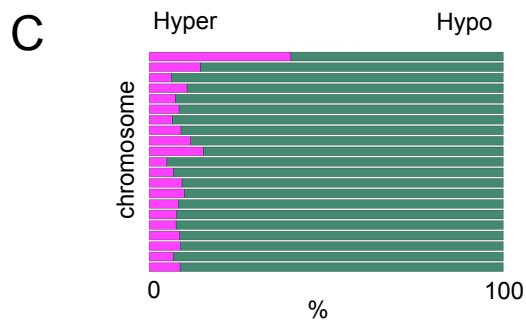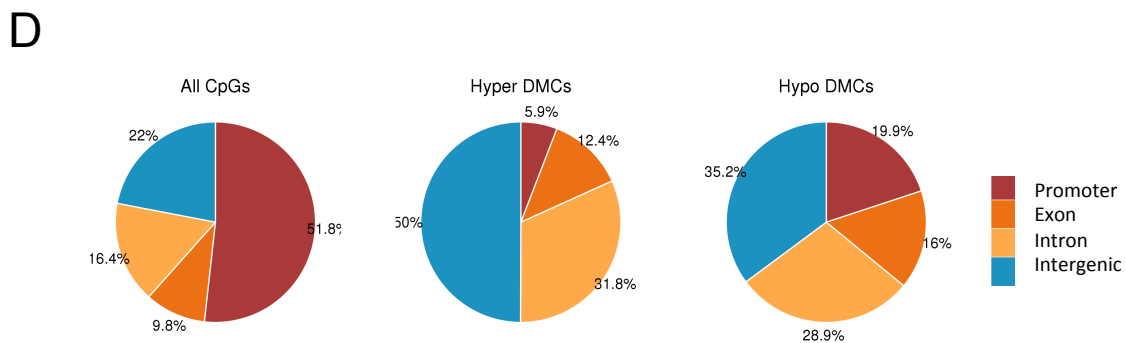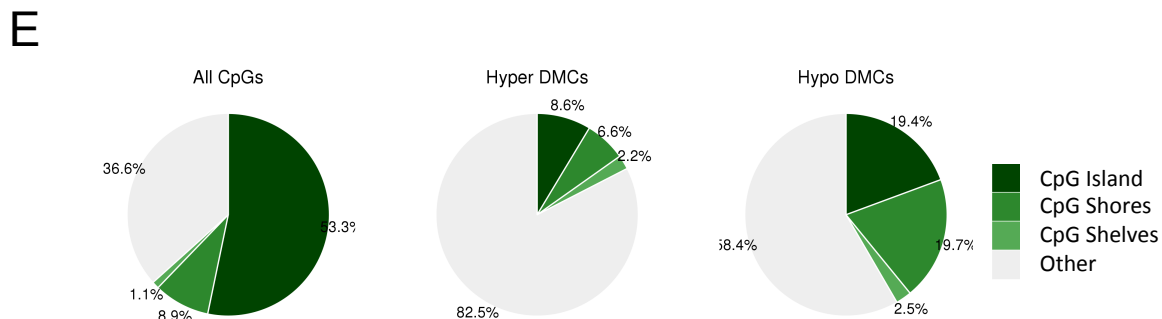

# Supplementary Figure 2

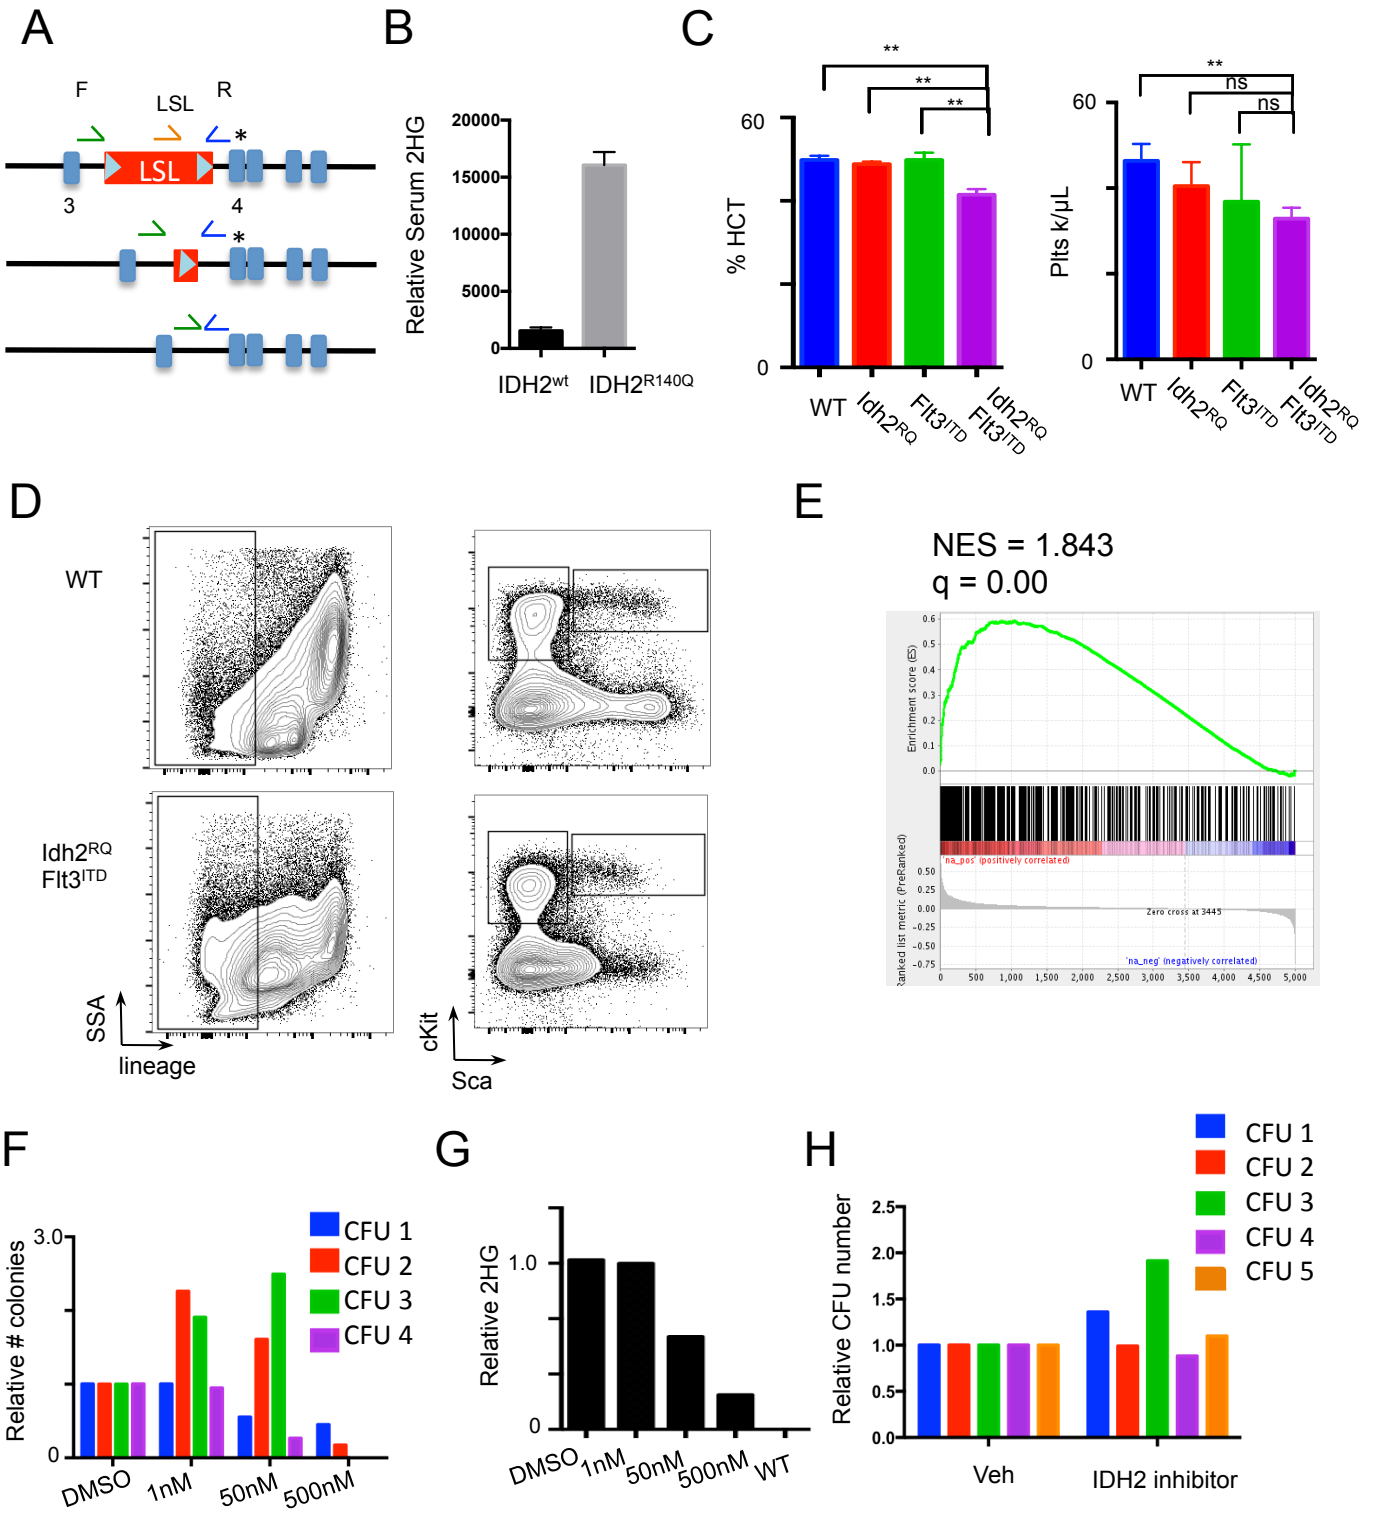

# Supplementary Figure 3

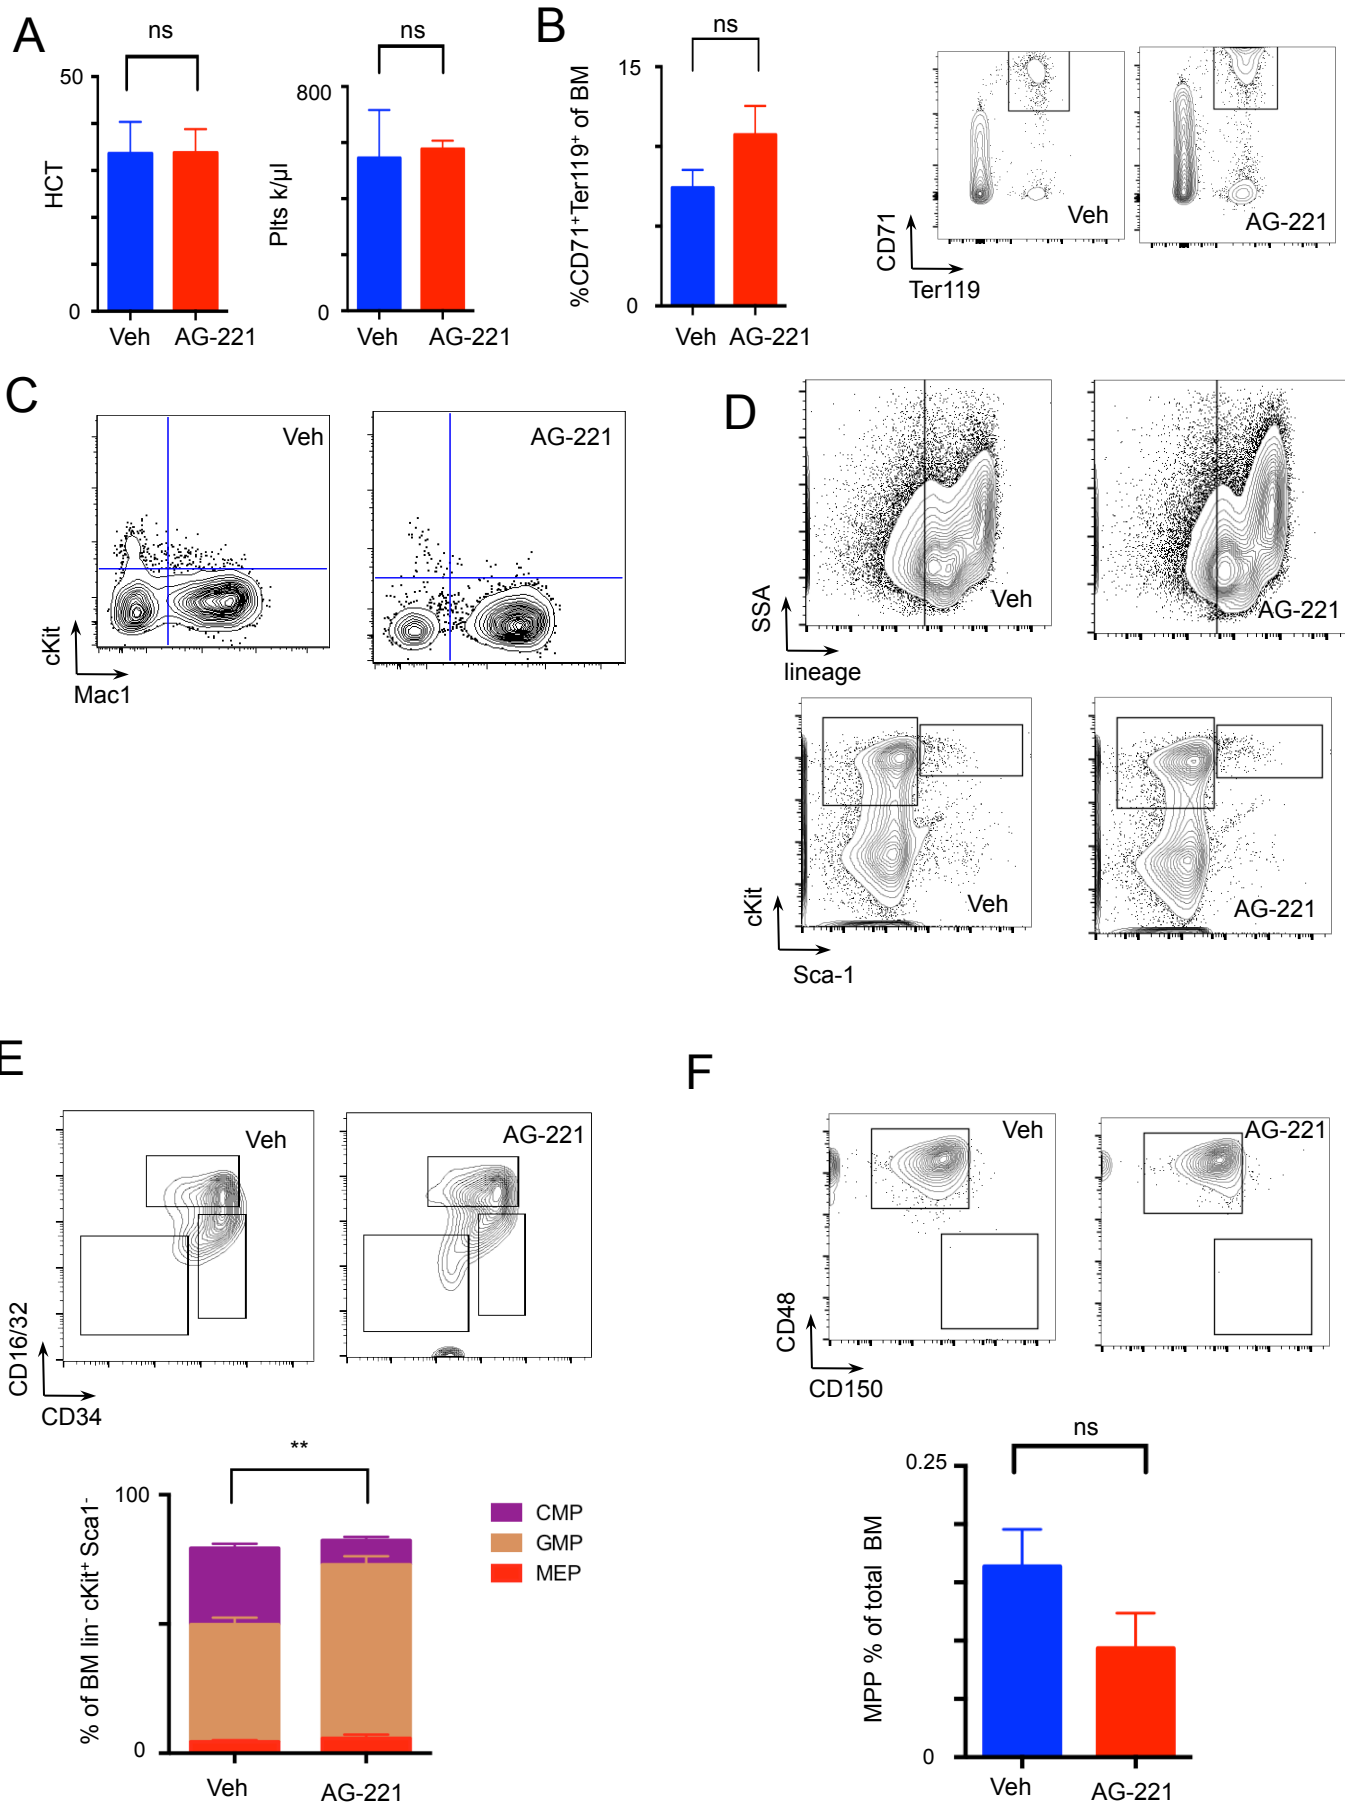

# Supplementary Figure 4

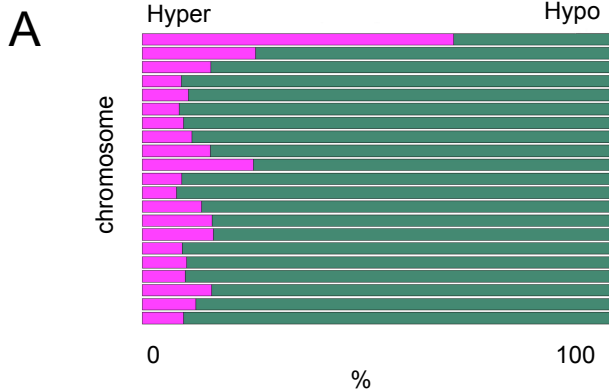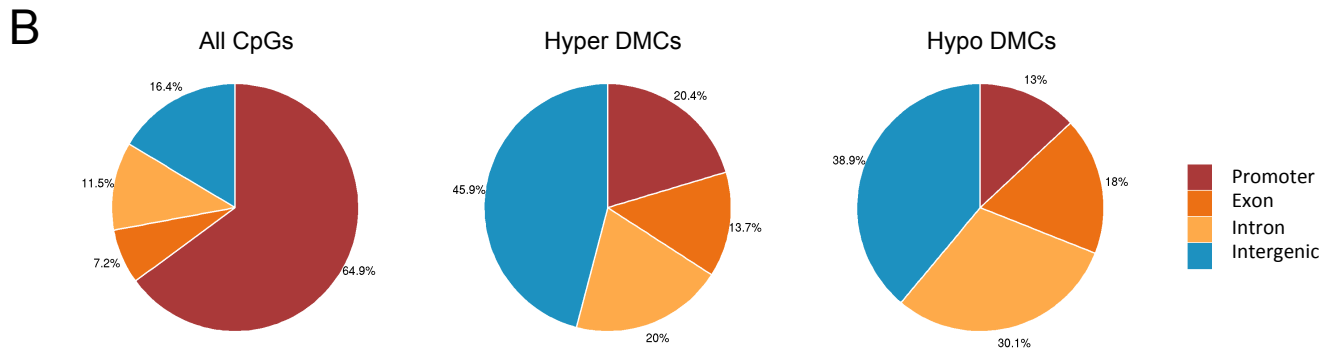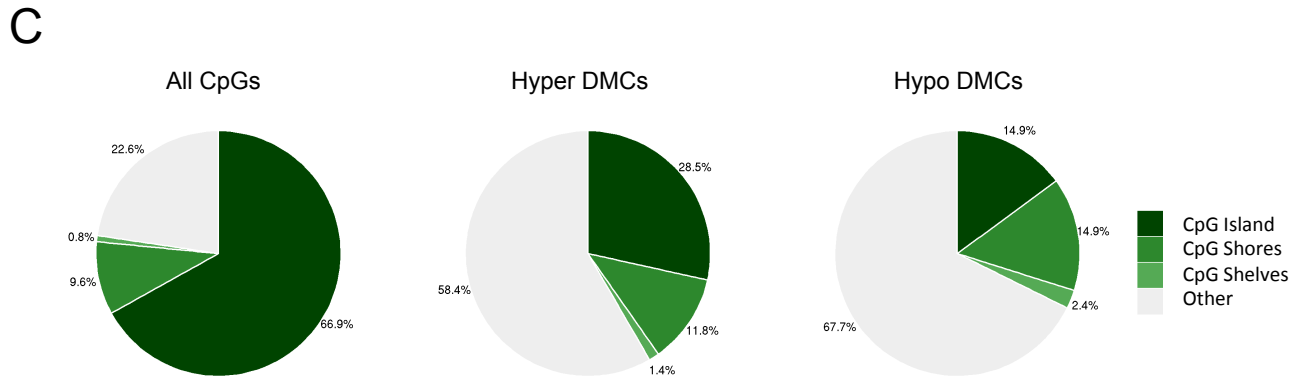

# Supplementary Figure 5

**A**

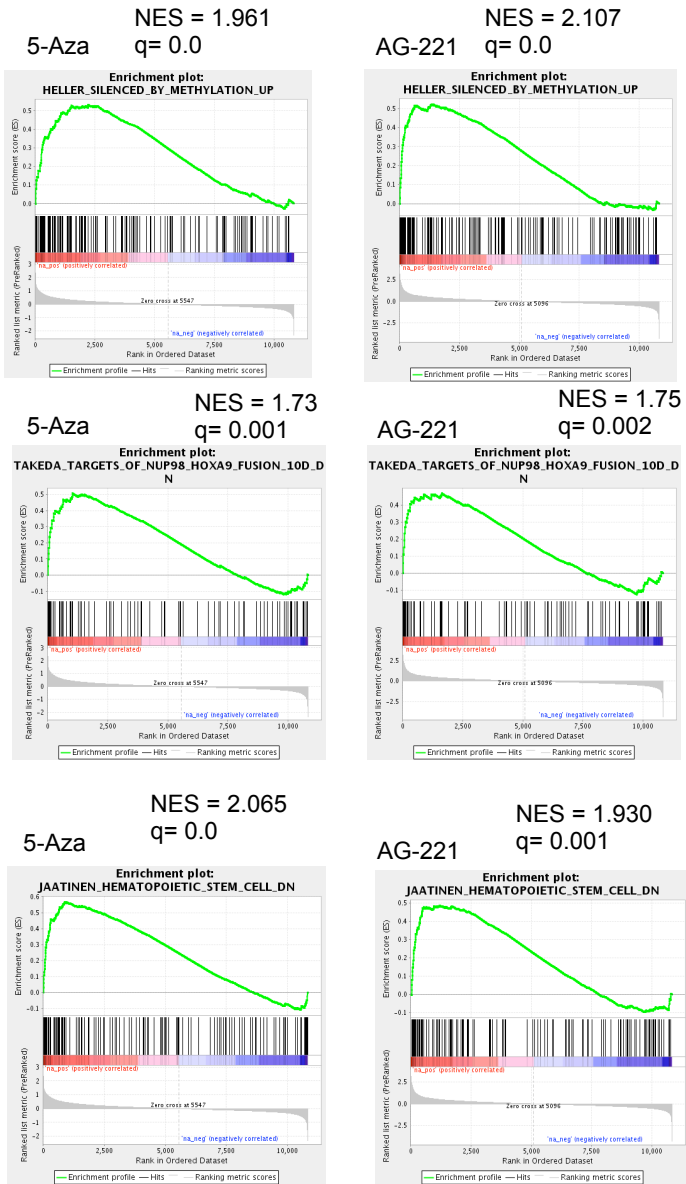

**C**

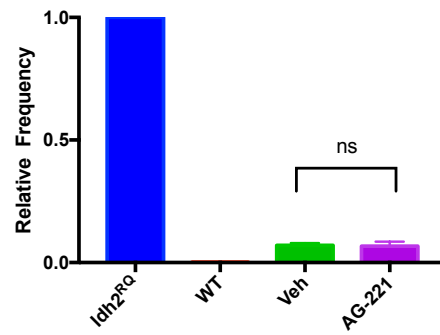

**D**

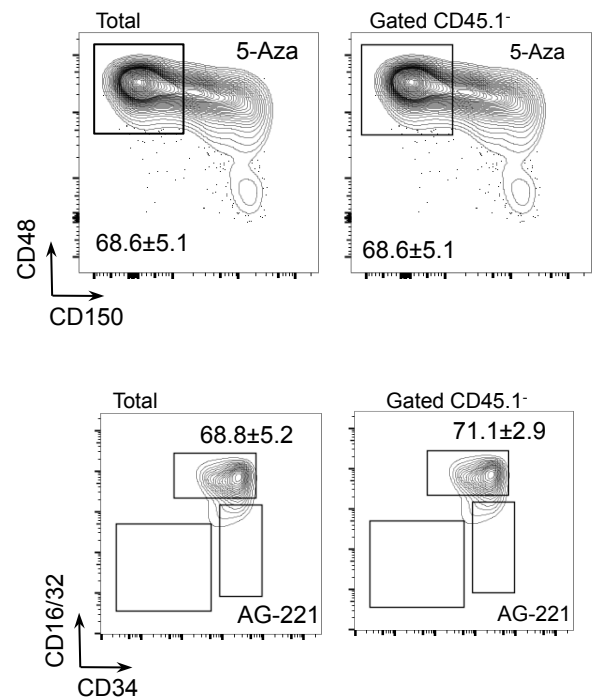

**B**

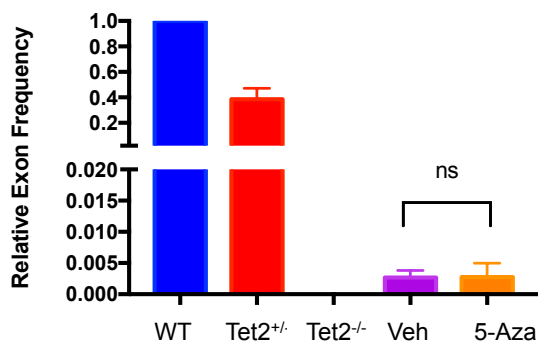

**E**

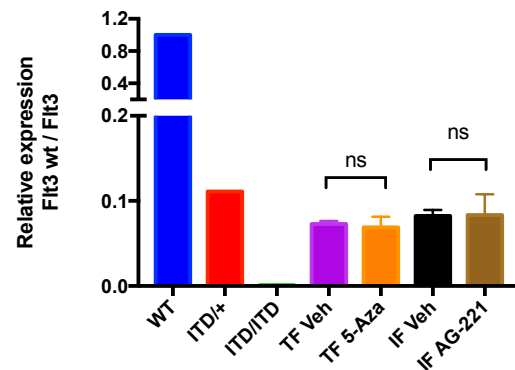

# Supplementary Figure 6

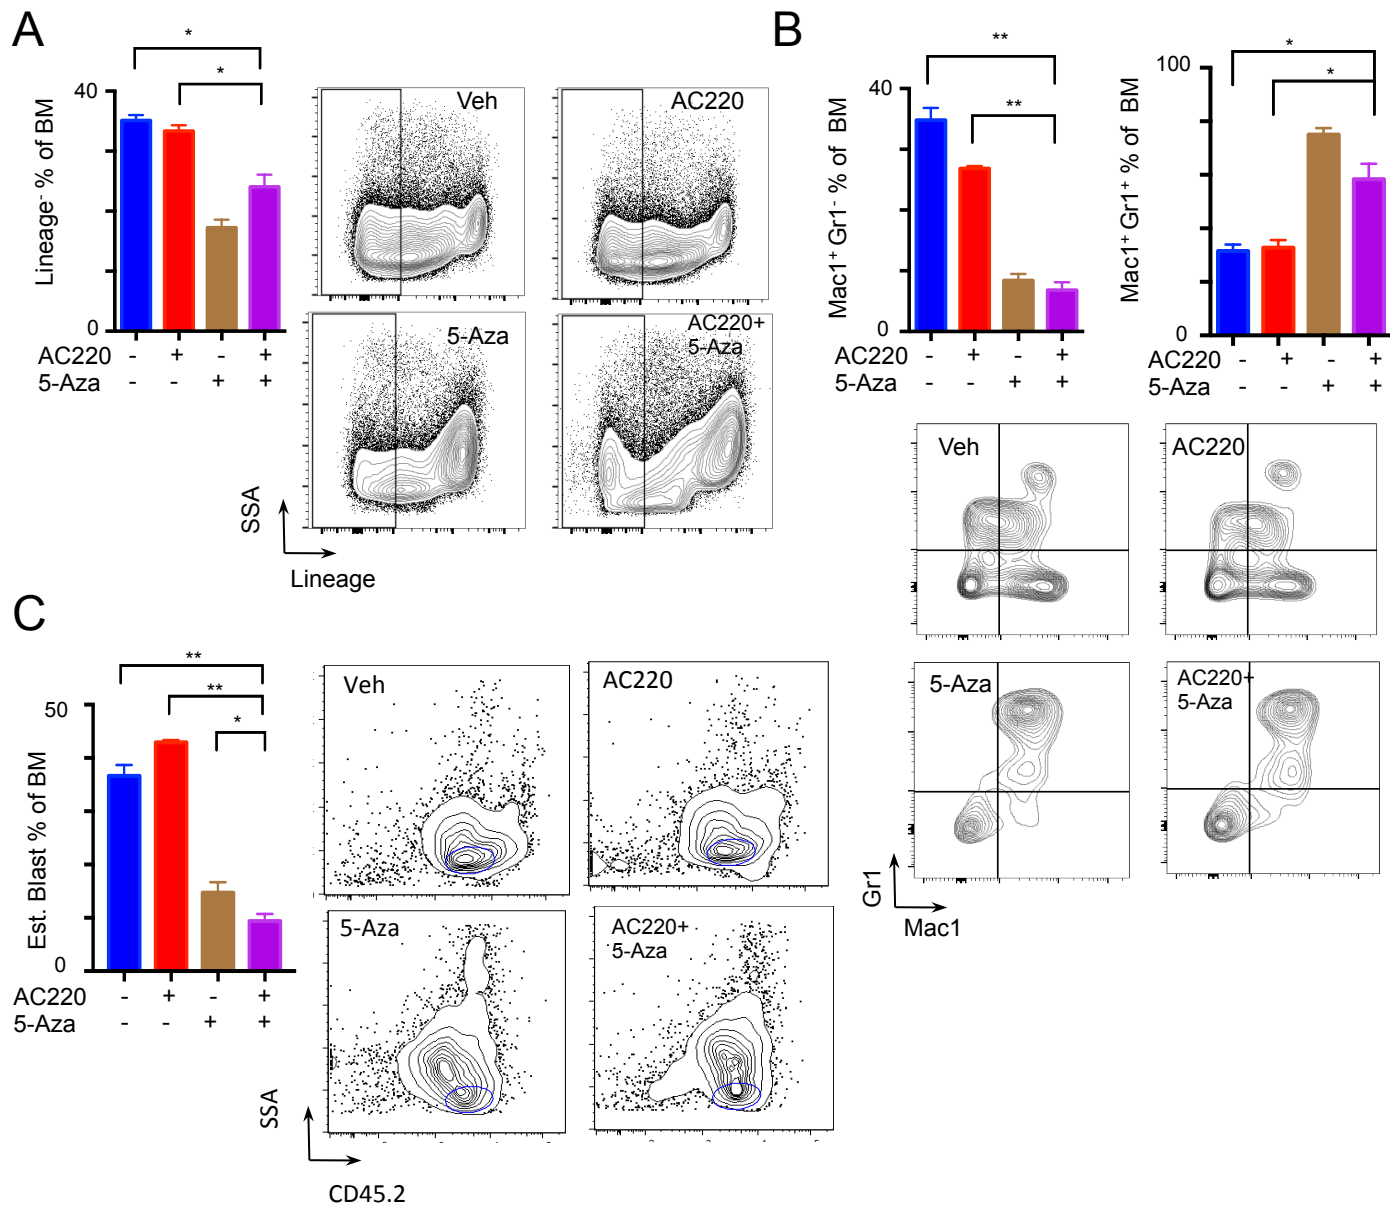

# Supplementary Figure 7

**A**

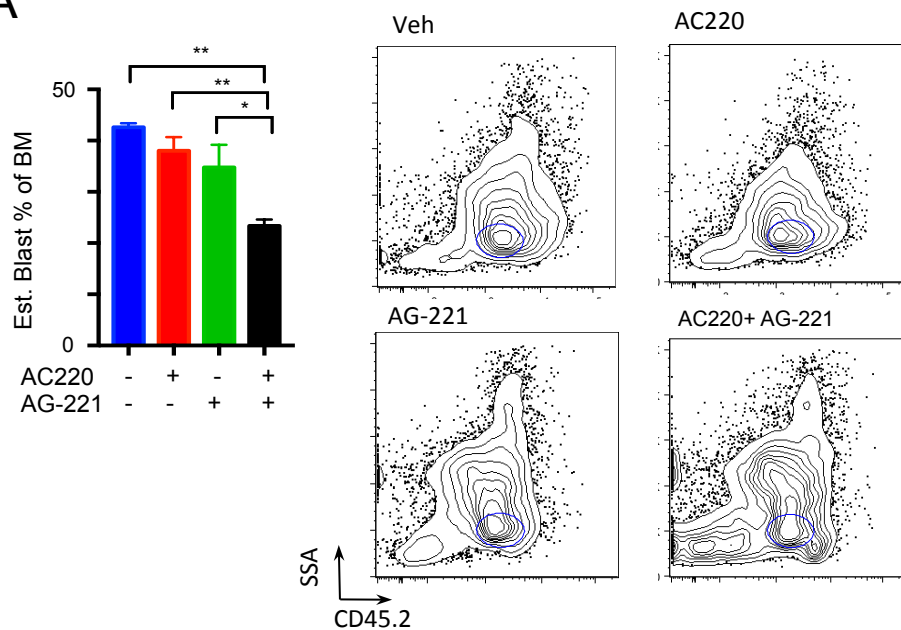

**B**

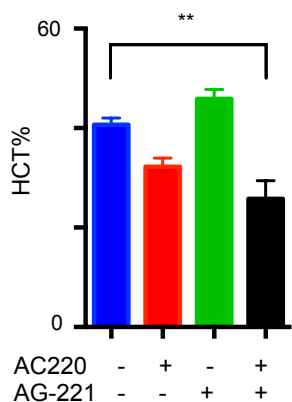

**C**

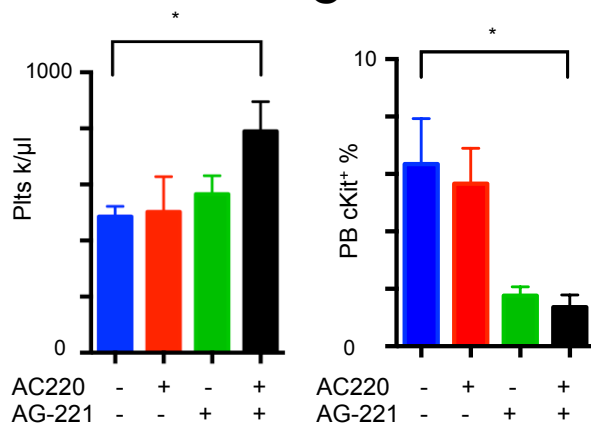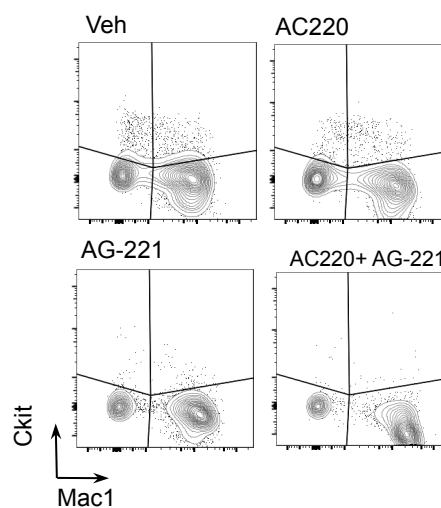

**D**

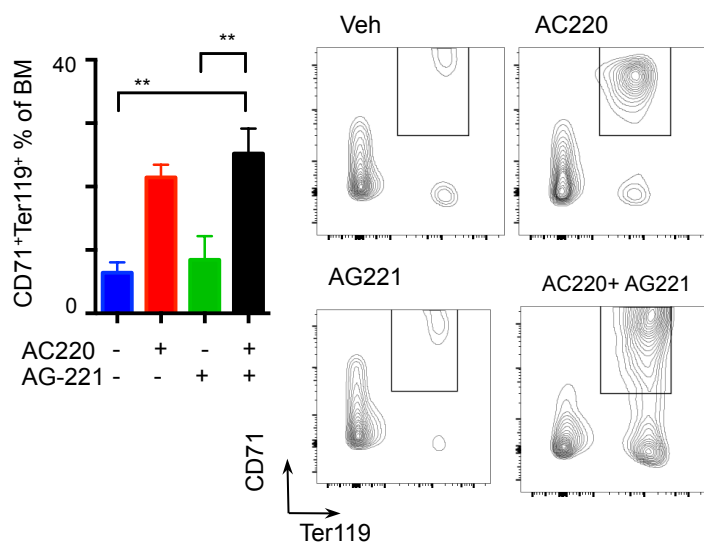

# Supplementary Figure 7 (con't)

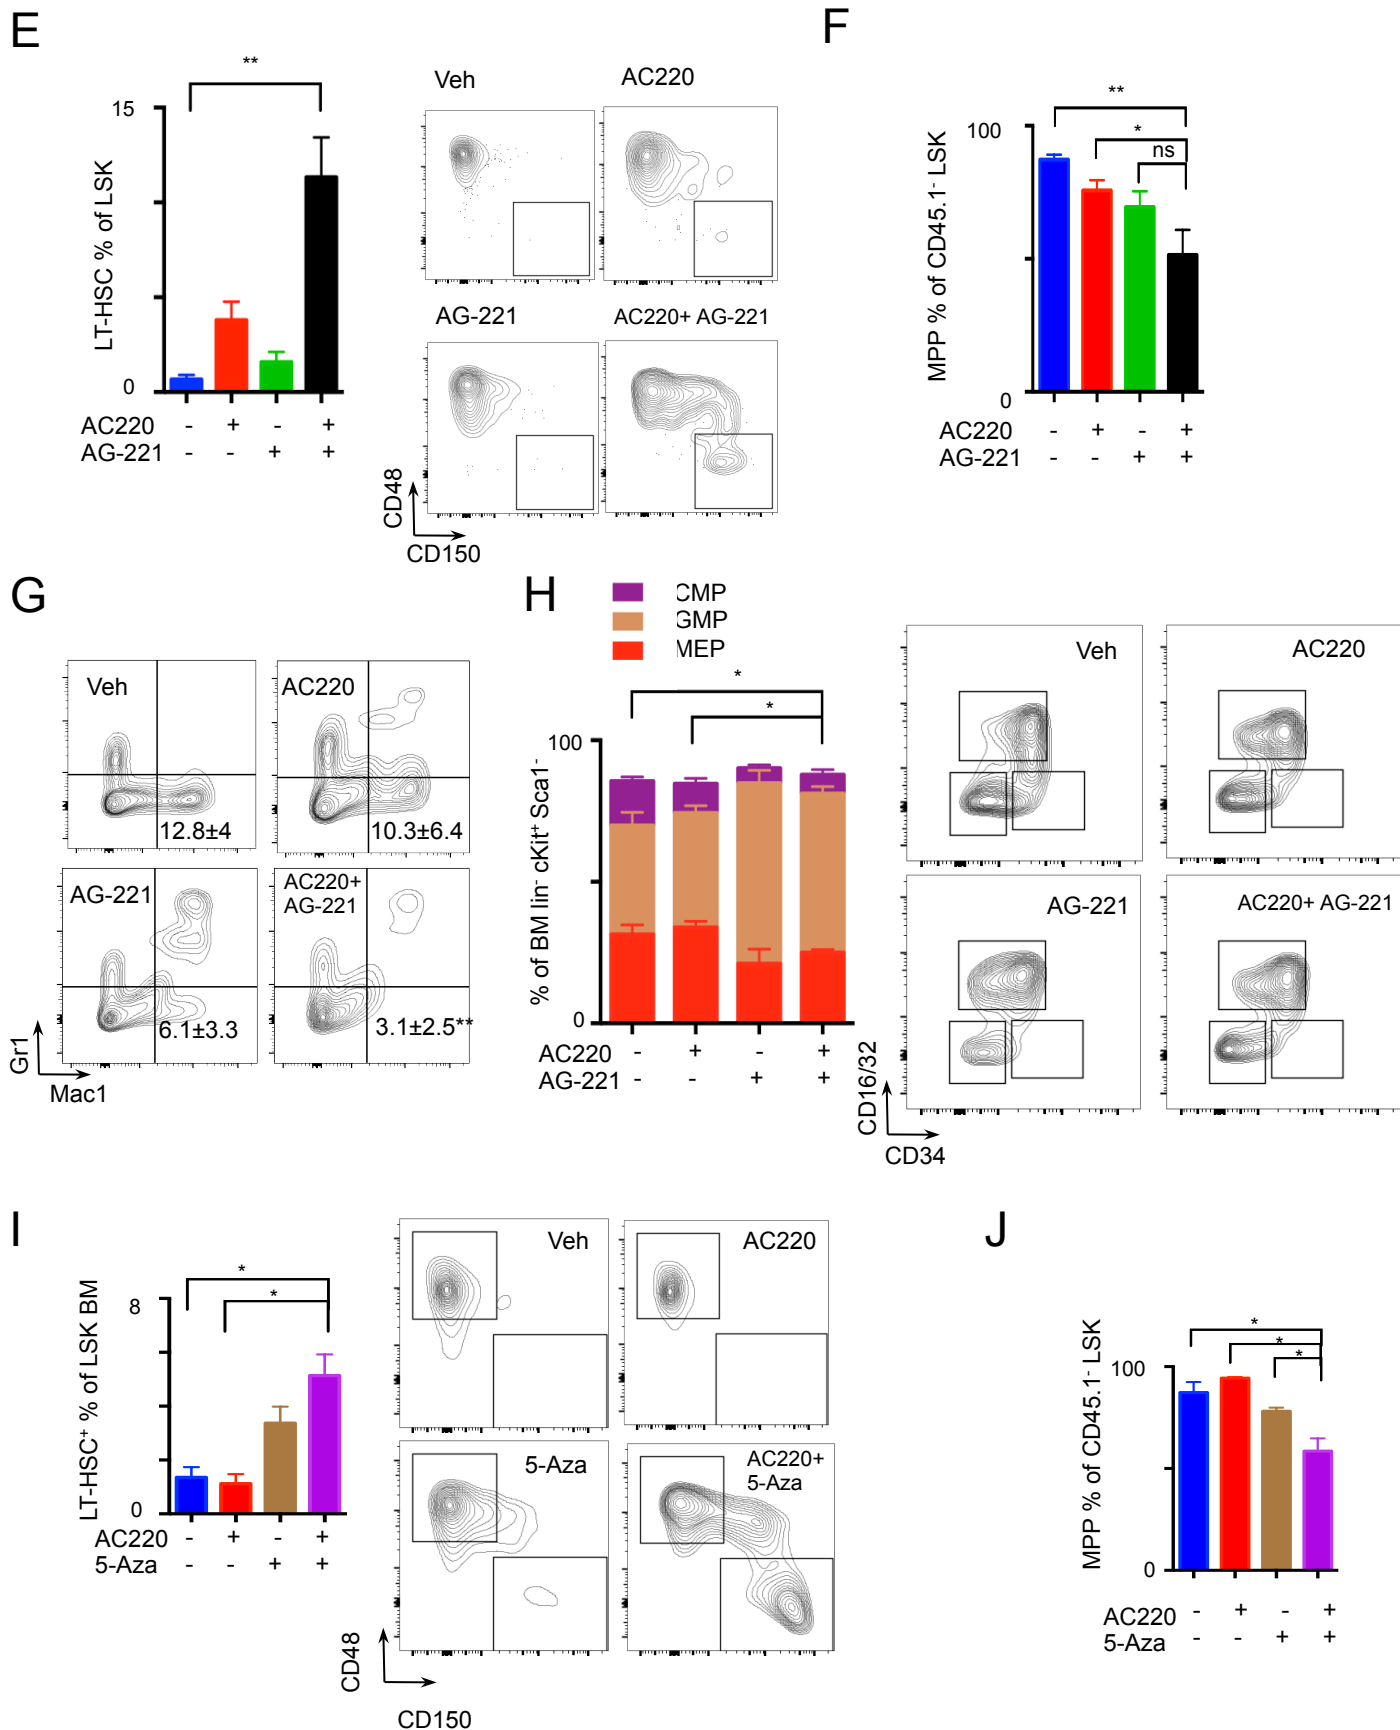



# Supplementary Figure 8

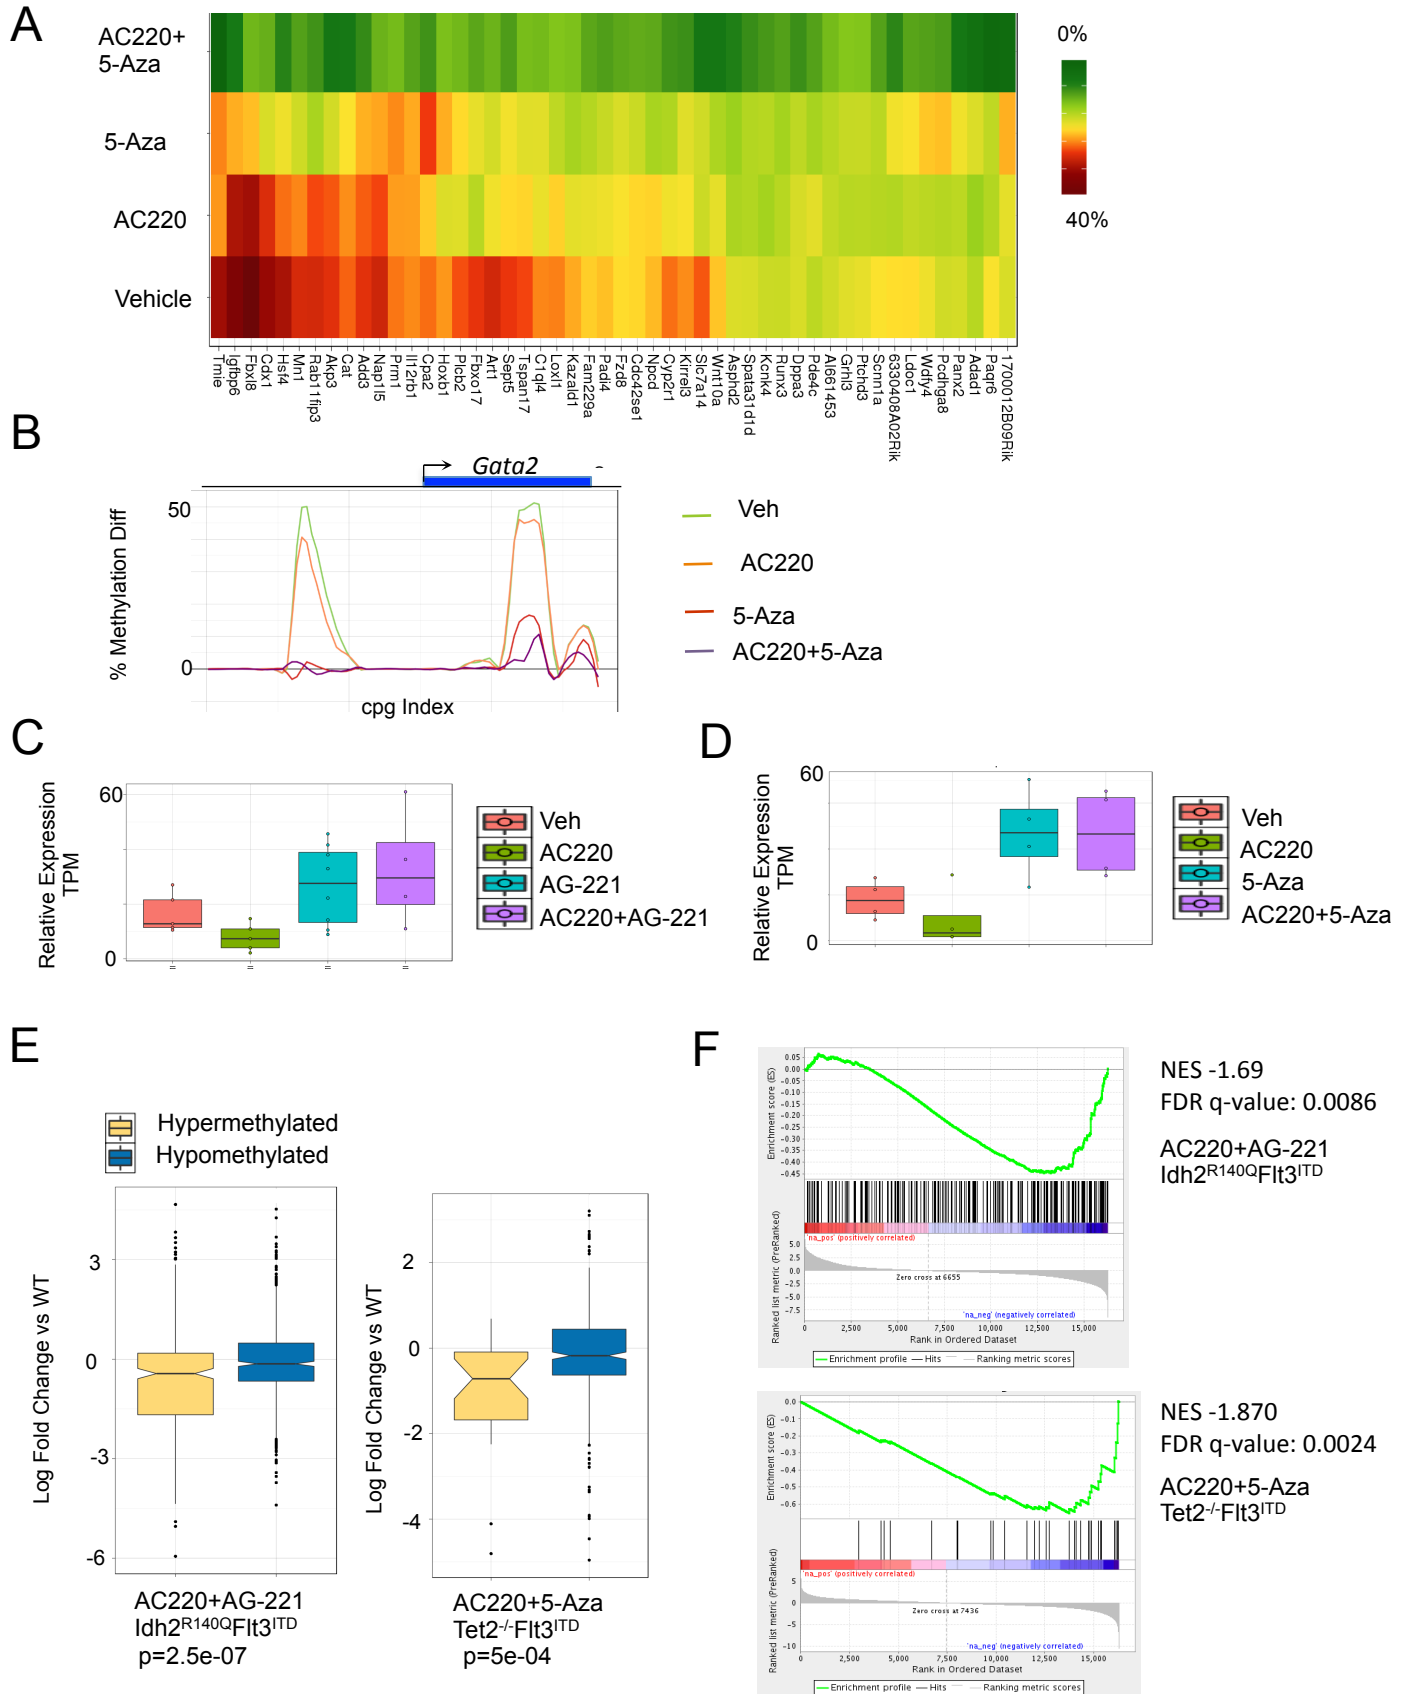

# Supplementary Figure 9

**A**

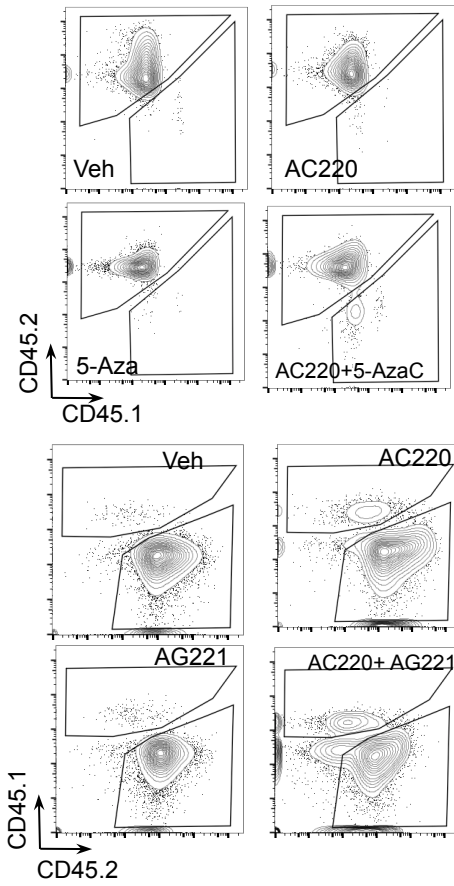

**B**

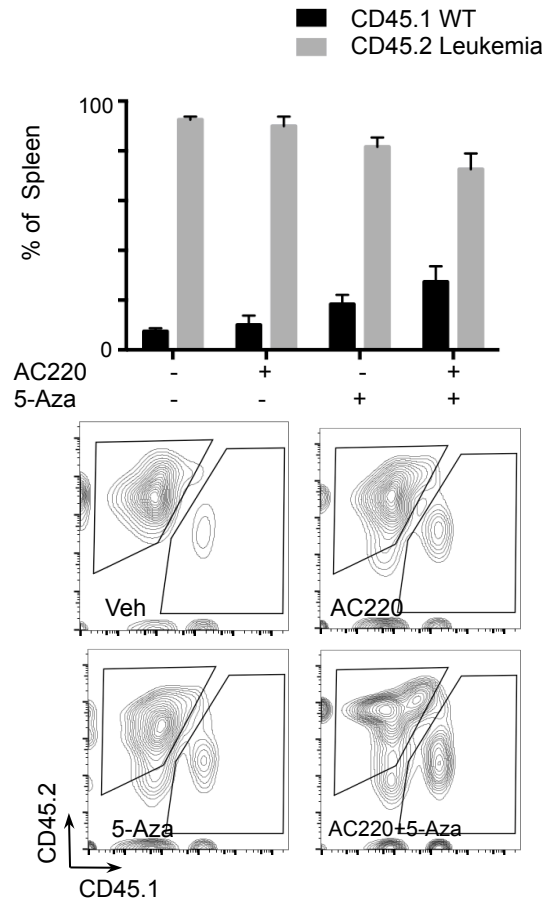

**C**

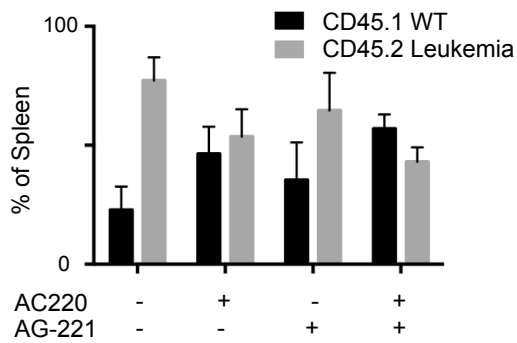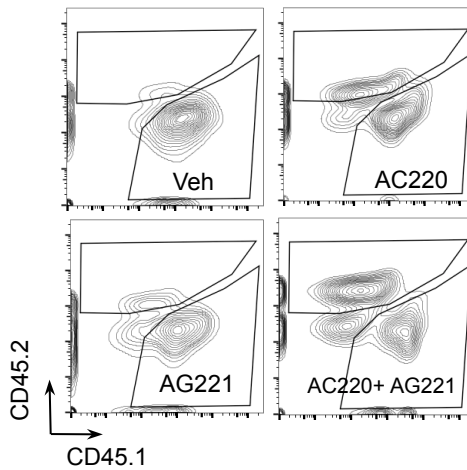

**D**

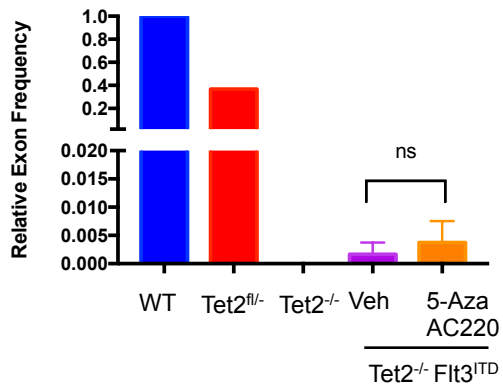

**E**

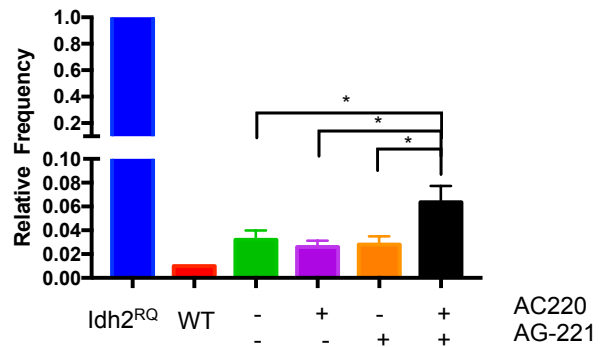

Supplement: NIHMS853124-supplement-2.pdf [file NIHMS853124-supplement-2.pdf]
