# Supplementary material
Source: PubMed Central journal article supplement (PMC5413413)
Supplement: NIHMS853124-supplement-3.pdf [file NIHMS853124-supplement-3.pdf]

Supplementary Table S1. List of Synergy Genes

|               |               |
|---------------|---------------|
| Zfp503        | Trpv4         |
| Foxd2os       | Pxdc1         |
| Rps4l         | Rgs10         |
| Cyp2r1        | Rpl39l        |
| Tmem59l       | Syde1         |
| Tmem51        | Sh2d4a        |
| Gm53          | Carns1        |
| Slc22a3       | BC016579      |
| Crb3          | Tceal1        |
| Bend4         | Slc16a11      |
| Phactr2       | 2900026A02Rik |
| 4933428G20Rik | Rinl          |
| Id3           | Dennd5b       |
| Plxna1        | Nrg1          |
| Hivep3        | Mtss1l        |
| Lhcgr         | Meg3          |
| Sgsm3         | Gm9199        |
| Ppp1r3fos     | Gramd2        |
| 5930403L14Rik | Myl10         |
| BC048507      | Itga2         |
| Cacna1i       | Tnfsf10       |
| Obscn         | Smtnl1        |
| Gm3336        | Sema3d        |
| D430019H16Rik | Gstk1         |
| Bgn           | Myh10         |
| Gata2         | Vwc2          |
| Epcam         | Mapkapk3      |
| Prkca         | AI854703      |
| Spry4         | Selplg        |
| Plod3         | Igfals        |
| Gfpt2         | Slc17a8       |
| Podxl         | Ifi30         |
| Vsig2         |               |

Supplementary Table S2.

**A,** Statistical testing of DMCs identified in combination therapy compared to single treatment.

| p-values (Wilcoxon) |              | Hyper-methylated DMCs |          | Hypo-methylated DMCs |          | All DMCs |          |
|---------------------|--------------|-----------------------|----------|----------------------|----------|----------|----------|
|                     |              | AC220                 | AG-221   | AC220                | AG-221   | AC220    | AG-221   |
| <i>Idh2 Flt3</i>    | AC220+AG-221 | 5.00E-02              | 7.30E-05 | 5.80E-07             | 6.10E-02 | 1.55E-07 | 1.22E-03 |
|                     |              |                       |          |                      |          |          |          |
|                     |              | Hyper-methylated DMCs |          | Hypo-methylated DMCs |          | All DMCs |          |
|                     |              | AC220                 | 5-Aza    | AC220                | 5-Aza    | AC220    | 5-Aza    |
| <i>Tet2 Flt3</i>    | AC220+5-Aza  | 9.10E-01              | 6.20E-01 | 1.20E-13             | 1.60E-02 | 1.21E-11 | 1.13E-02 |

**B,** Differentially methylated CpGs in response to combination therapy.

|                                                                                                       |
|-------------------------------------------------------------------------------------------------------|
| <b>AC220+AG-221</b>                                                                                   |
| - 39618 synergistic hypo-methylated CpGs (of which 38015 or 95.9% are unique to the combo treatment)  |
| - 18808 synergistic hyper-methylated CpGs (of which 18271 or 97.1% are unique to the combo treatment) |
|                                                                                                       |
| <b>AC220+5-Aza</b>                                                                                    |
| - 16572 synergistic hypo-methylated CpGs (of which 15477 or 93.4% are unique to the combo treatment)  |
| - 7624 synergistic hyper-methylated CpGs (of which 7554 or 99.1% are unique to the combo treatment)   |
